# Supplementary material
Source: Springer Nature journal article supplement (https://www.springermedizin.de/resource/supplementary/12889_2013_5549_MOESM4_ESM.pdf/9495640)
Supplement: MOESM4 [file 9495640]

|                                         |       |      |             |      |             |      |             |      |             |             |             |        |
|-----------------------------------------|-------|------|-------------|------|-------------|------|-------------|------|-------------|-------------|-------------|--------|
| Low                                     | 2,249 | 47.1 | (45.0-49.2) | 39.1 | (36.6-41.7) | 47.0 | (44.4-49.7) | 13.9 | (12.1-15.8) | 0.91        | (0.78-1.07) |        |
| Middle                                  | 4,083 | 51.2 | (49.7-52.7) | 39.9 | (37.9-41.9) | 50.4 | (48.3-52.5) | 9.7  | (8.6-10.8)  | 0.90        | (0.80-1.00) |        |
| High                                    | 2,403 | 55.1 | (53.0-57.3) | 42.5 | (40.4-44.7) | 47.6 | (45.4-49.8) | 9.9  | (8.5-11.4)  | 1(Referenz) |             |        |
| Missing                                 | 164   |      |             |      |             |      |             |      |             |             |             |        |
| Parents' rated subjective health status |       |      |             |      |             |      |             |      |             |             |             | < .001 |
| Excellent                               | 3,261 | 47.2 | (45.4-48.9) | 38.2 | (36.1-40.3) | 51.7 | (49.6-53.8) | 10.1 | (9.1-11.2)  | 0.71        | (0.58-0.88) |        |
| Good                                    | 4,840 | 52.1 | (50.6-62.9) | 41.2 | (39.4-42.9) | 47.1 | (45.3-49.0) | 11.7 | (10.5-13.0) | 0.89        | (0.73-1.07) |        |
| Moderate/Bad/Very Bad                   | 798   | 60.0 | (49.5-52.2) | 41.7 | (37.9-45.6) | 46.7 | (42.8-50.7) | 11.6 | (9.3-14.3)  | 1(Referenz) |             |        |

n unweighted, % weighted
